# Supplementary material for: High pressure pyrolyzed non-precious metal oxygen reduction catalysts for alkaline polymer electrolyte membrane fuel cells
Source: Royal Society of Chemistry journal article supplement (doi:10.1039/c5nr00311c), 2015-01-01
Supplement: c5nr00311c1.pdf [file c5nr00311c1.pdf]

Electronic Supporting Information (ESI)

High Pressure Pyrolyzed Non-precious Oxygen Reduction Catalysts for Alkaline  
Polymer Electrolyte Membrane Fuel Cells

*Jakkid Sanetuntikul and Sangaraju Shanmugam\**

Department of Energy Systems Engineering, Daegu Gyeongbuk Institute of Science & Technology  
(DGIST),

Dalseong-gun, Daegu 711-873, Korea.

E-mail: [sangarajus@dgist.ac.kr](mailto:sangarajus@dgist.ac.kr)

## Characterization:

The N<sub>2</sub> adsorption–desorption measurements were carried out using ‘Micromeritics’ (ASAP 2020) at 77 K. Bruner–Emmett–Teller (BET), Barrett–Joyner–Halenda (BJH) models and the t-plot method (Harkins and Jura formula) were used to determine the specific surface area, the microporous (0.5-2 nm) and mesoporous (2-50 nm) pore size distributions and microporous information for the cobalt embedded carbon nanorods samples, respectively. Before the measurements, the samples were degassed at 200 °C under vacuum for 4 hours. The amount of nitrogen and carbon in samples were accurately determined by elemental analyzer (C, H, N analysis).

The kinetics of ORR on M-N-C catalyst evaluated by Koutecky-Levich plots were determined by follow equation.

$$\frac{1}{J} = \frac{1}{J_L} + \frac{1}{J_K} = \frac{1}{B\omega^{\frac{1}{2}}} + \frac{1}{J_K}$$
$$B = 0.62 n F C_0 D_0^{\frac{2}{3}} \nu^{-\frac{1}{6}}$$

Where, J is the experimentally measured current, J<sub>L</sub> is the diffusion-limiting current, J<sub>K</sub> is the kinetic current, ω is the angular velocity, F is the Faraday constant, C<sub>0</sub> is the saturated concentration of O<sub>2</sub> in 0.1M KOH (1.2 x 10<sup>-6</sup> mol cm<sup>-3</sup>), D<sub>0</sub> is the diffusion coefficient of O<sub>2</sub> in 0.1M KOH (1.9 x 10<sup>-5</sup> cm<sup>2</sup> s<sup>-1</sup>), and ν is the kinematic viscosity of the electrolyte. “n” can calculate from slop by under plot of J<sup>-1</sup> vs ω<sup>-1/2</sup> and J<sub>k</sub> is calculated from inverse of intercept.

The formation of  $\text{HO}_2^-$  and the electron transfer number from RRDE experiment were determined by follow equation;

$$\text{H}_2\text{O}_2(\%) = 200 \times \frac{I_R/N}{I_D + (I_R/N)}$$

$$n = 4 \times \frac{I_D}{I_D + (I_R/N)}$$

where,  $I_D$  is the disk current,  $I_R$  is the ring current, and  $N$  is the ring correction coefficient in RRDE experiment was determine to be 0.37 from the reduction of  $\text{Fe}(\text{CN})_6^{4-/3-}$  redox couple. The ring potential was held at 1.3 vs. RHE.

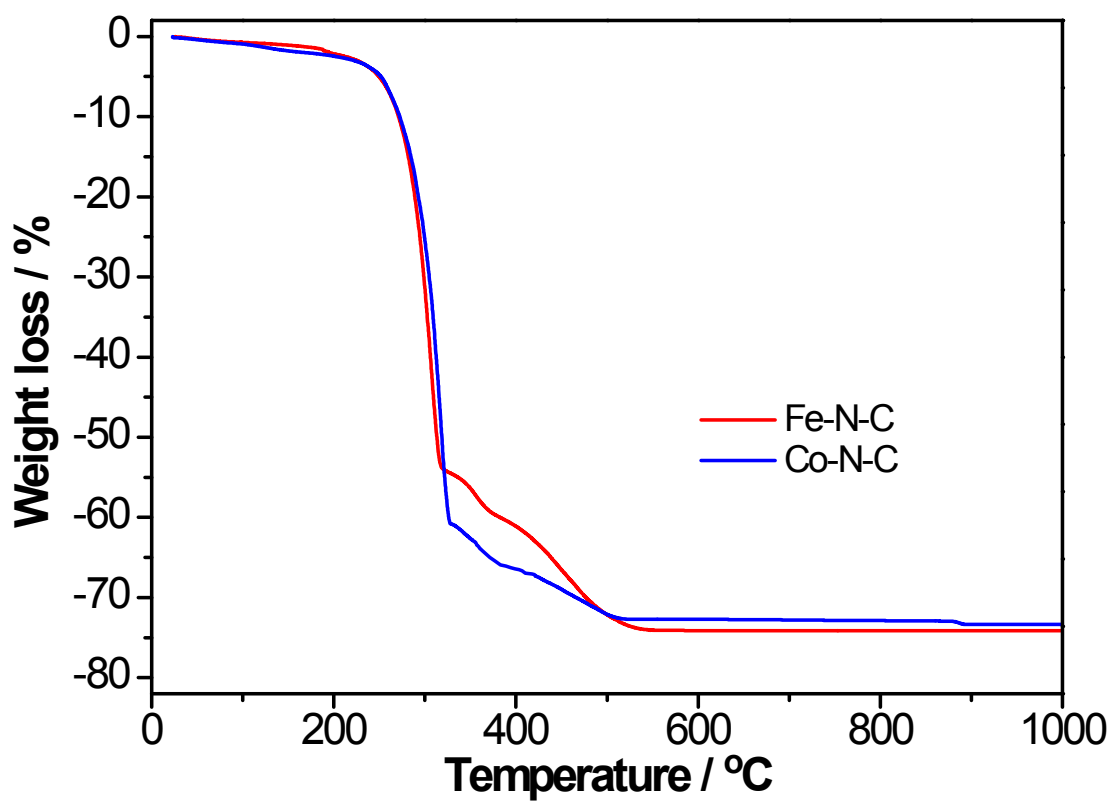

**Figure S1.** Thermograms of Fe-N-C and Co-N-C precursors carried out in an air atmosphere with a heating rate of  $10^{\circ}\text{C min}^{-1}$

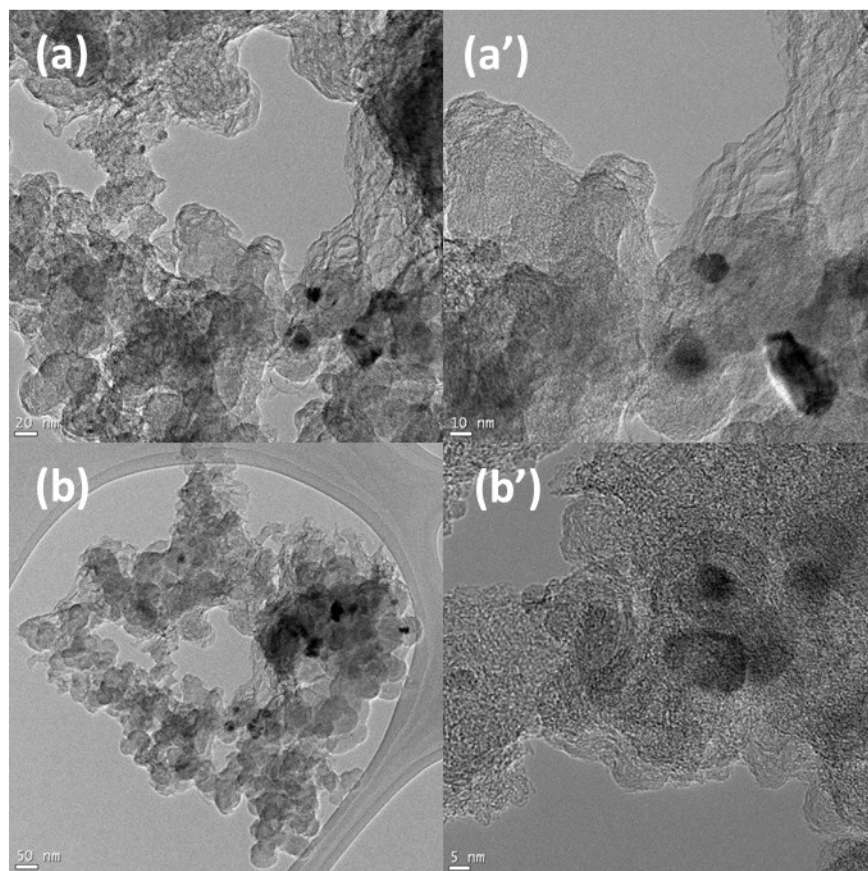

**Figure S2.** TEM images of (a, a') Fe-N-C (b, b') Co-N-C catalyst

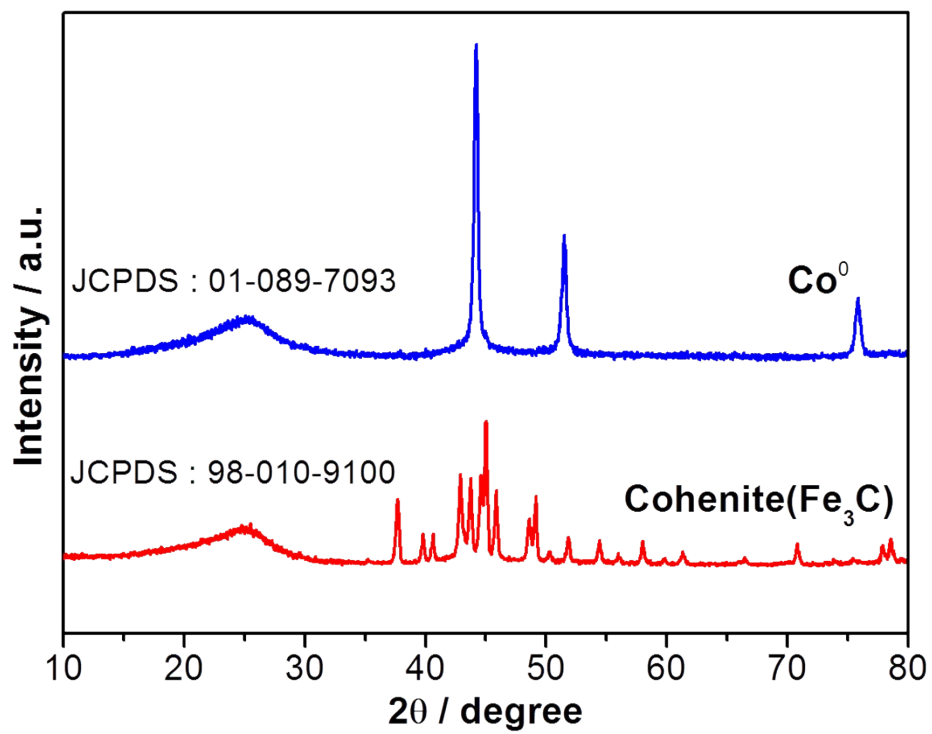

**Figure S3.** XRD patterns of as-synthesized products after first heat-treated (before acid treatment)

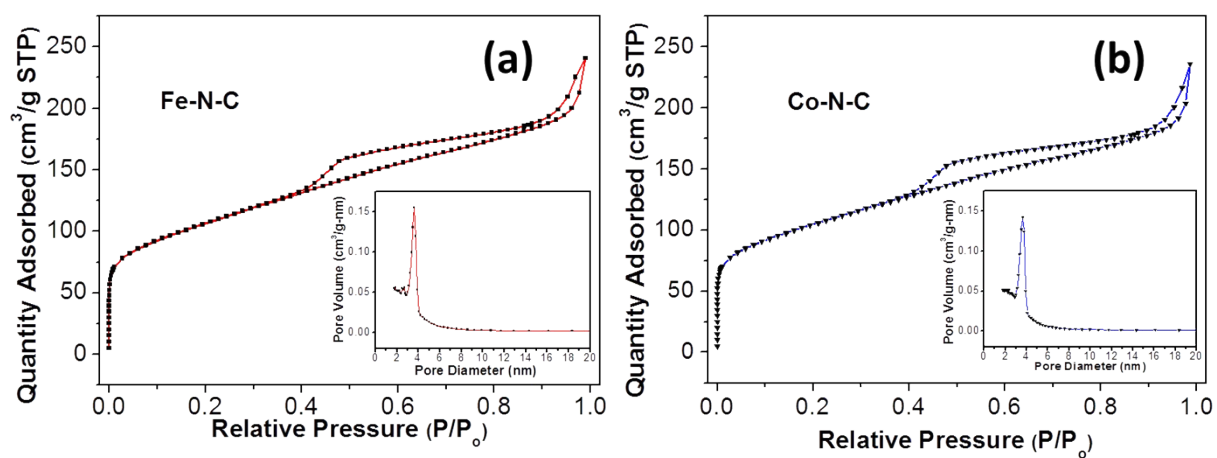

**Figure S4.** BET surface area analysis of (a) Fe-N-C (b) Co-N-C catalysts; insets show BJH pore-size distribution.

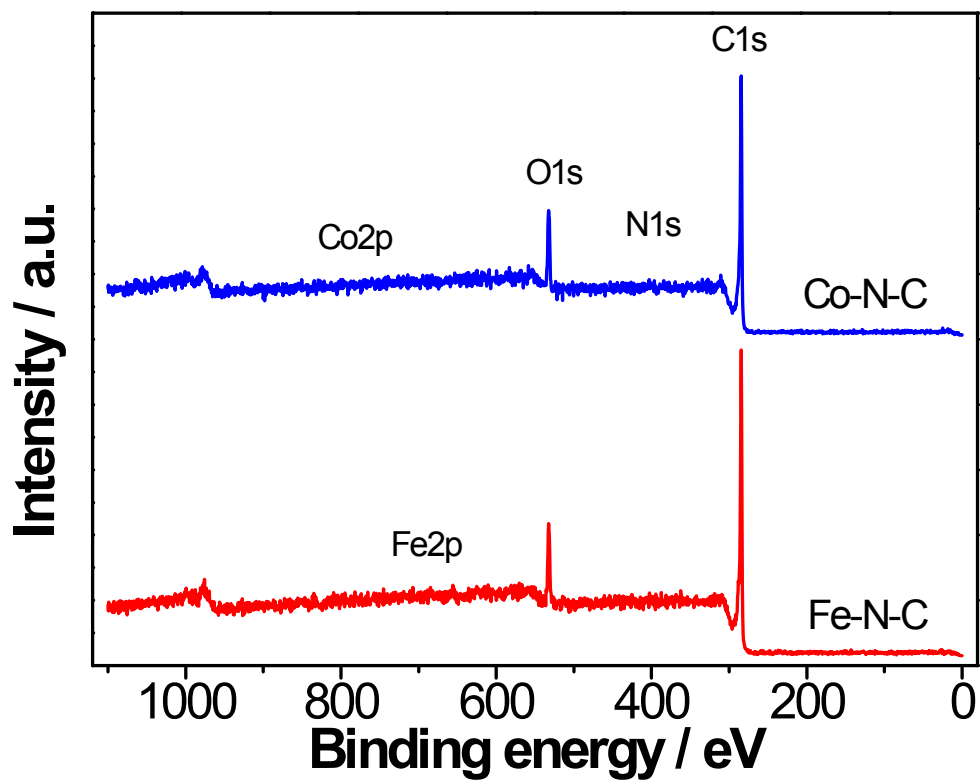

**Figure S5.** XPS survey spectra of Fe-N-C and Co-N-C catalyst.



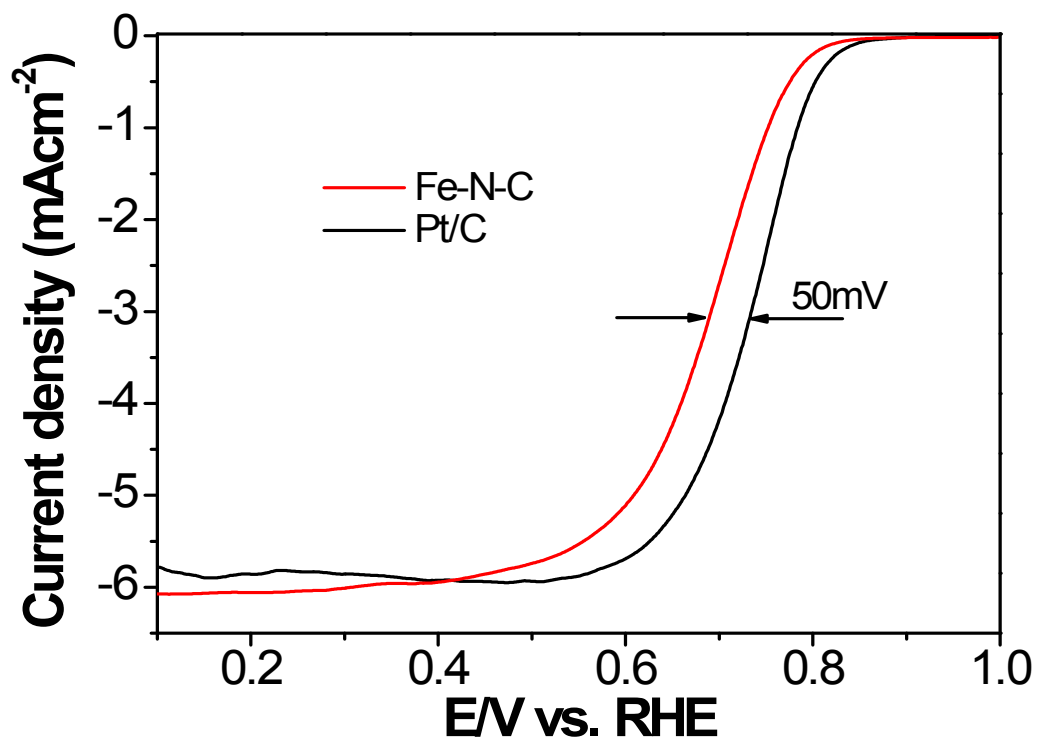

**Figure S6.** RDE traces of Fe-N-C ( $0.6 \text{ mg cm}^{-2}$ ) and Pt/C ( $30 \mu\text{g cm}^{-2}$ ) catalysts obtained at 1,600 rpm in  $\text{O}_2$ -saturated  $0.5\text{M H}_2\text{SO}_4$  (cathodic scan direction) in  $0.5\text{M H}_2\text{SO}_4$  electrolyte, All potential were converted to RHE scale by adding  $0.26\text{V}$ .

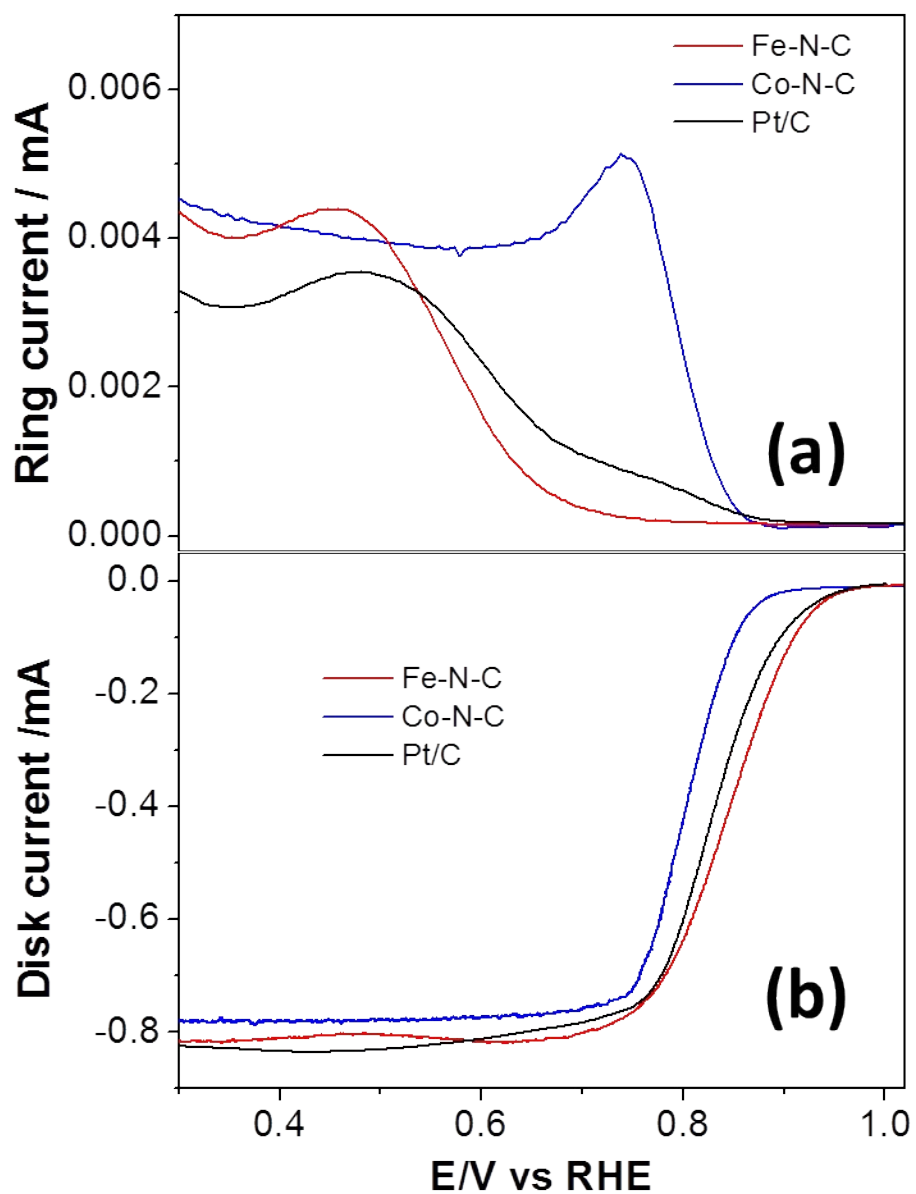

**Figure S7.** RRDE response of Fe-N-C, Co-N-C and Pt/C catalysts obtained at 1600 rpm in O<sub>2</sub>-saturated 0.1 M KOH. (catalyst loading- 0.4 mg cm<sup>-2</sup> ; Pt/C -30 μg cm<sup>-2</sup> )

**Table S1.** The XPS data of Fe-N-C and Co-N-C catalysts.

| Catalyst | N1s<br>Distribution<br>(%) |      |      | Total<br>N<br>content<br>(%) | Fe2p <sub>3/2</sub><br>Distribution<br>(%) |         | Total<br>Fe<br>content<br>(%) | Co2p <sub>3/2</sub><br>distribution<br>(%) |                   | Total<br>Co<br>Content<br>(%) | N/C<br>ratio<br>(%) |
|----------|----------------------------|------|------|------------------------------|--------------------------------------------|---------|-------------------------------|--------------------------------------------|-------------------|-------------------------------|---------------------|
|          | N1                         | N2   | N3   |                              | Fe(II)                                     | Fe(III) |                               | Co-<br>O                                   | Co-N <sub>x</sub> |                               |                     |
| Fe-N-C   | 1.1                        | 1.82 | 0.16 | 3.08                         | 0.4                                        | 0.28    | 0.68                          | -                                          | -                 | -                             | 0.033               |
| Co-N-C   | 0.32                       | 0.81 | 0.18 | 1.31                         | -                                          | -       | -                             | 0.67                                       | 0.06              | 0.73                          | 0.014               |

**Table S2.** The CHN elemental analysis of Fe-N-C and Co-N-C catalysts.

| Catalyst | C(wt%) | H(wt%) | N(wt%) | N/C ratio |
|----------|--------|--------|--------|-----------|
| Fe-N-C   | 92.29  | 0.85   | 1.05   | 0.011     |
| Co-N-C   | 89.37  | 1.04   | 0.68   | 0.007     |

**Table S3.** The alkaline membrane fuel cells performance data electrocatalyst with commercial membrane in H<sub>2</sub>-O<sub>2</sub> system, no added back pressurization, reported in the literature

| <b>Cathode material</b> | <b>Operating Temperature (°C)</b> | <b>Maximum power density (mW cm<sup>-2</sup>)</b> | <b>Reference</b> |
|-------------------------|-----------------------------------|---------------------------------------------------|------------------|
| Fe-N-C                  | 60                                | 75                                                | *                |
| Co-N-C                  | 60                                | 68                                                |                  |
| NpGr-72                 | 50                                | 27                                                | 1                |
| N-CNT                   | 50                                | 37.3                                              | 2                |
| MnO <sub>x</sub> -GC    | 70                                | 98                                                | 3                |
| Ag/C                    | 25                                | 10                                                | 4                |
| CoPc/MWCNT              | 50                                | 120                                               | 5                |
| FePc/MWCNT              | 50                                | 60                                                |                  |
| Au/C                    | 50                                | 36                                                | 6                |
| Ag/C                    | 50                                | 19                                                |                  |

\* Present study

## References

1. T. Palaniselvam, M. O. Valappil, R. Illathvalappil, and S. Kurungot, *Energy Environ. Sci.*, 2014, **7**, 1059.

2. C. V. Rao and Y. Ishikawa, *J. Phys. Chem. C*, 2012, **116**, 4340–4346.
3. J. W. D. Ng, Y. Gorlin, D. Nordlund, and T. F. Jaramillo, *J. Electrochem. Soc.*, 2014, **161**, D3105–D3112.
4. S. Maheswari, P. Sridhar, and S. Pitchumani, *Electrocatalysis*, 2011, **3**, 13–21.
5. I. Kruusenberg, L. Matisen, Q. Shah, A. M. Kannan, and K. Tammeveski, *Int. J. Hydrogen Energy*, 2012, **37**, 4406–4412.
6. S. D. Poynton, J. P. Kizewski, R. C. T. Slade, and J. R. Varcoe, *Solid State Ionics*, 2010, **181**, 219–222.
